# Supplementary material for: Efficacy of Endoscopic Endonasal Common Canaliculorhinostomy for Chronic Dacryocystitis with Small Lacrimal Sac in the Treatment of Failed Patients After EE-DCR
Source: Research Square preprint supplement (doi:10.21203/rs.3.rs-1305442/v1), 2022-02-14
Supplement: Supplementary file 1 [file c814d23afff9c36613f9cce5.xlsx]

## Sheet: Sheet1
Groups	Gender(female=0,male=1)	Eye type（left=1,right=2）	Age（years）	Course of disease（months）	Curative effect（success=0, fail=1）	Failure reason
B	0	1	47	5	1	Granulation tissue formation with scar hyperplasia
A	0	1	45	6	0
A	0	2	72	5	0
A	0	1	51	120	1	Granulation tissue formation
B	0	2	37	6	0
A	0	1	75	120	0
A	0	2	51	12	0
A	0	2	51	5	1	Scar hyperplasia
B	0	1	47	120	1	Granulation tissue formation
A	0	2	67	24	0
A	0	1	47	36	0
B	0	1	49	5	0
A	0	1	63	36	0
B	1	1	59	12	0
A	0	2	39	60	0
A	0	2	68	6	0
B	0	1	60	24	0
A	0	1	52	5	0
B	0	2	54	24	1	Granulation tissue formation
A	0	2	52	60	1	Granulation tissue formation with scar hyperplasia
A	0	1	69	24	0
A	0	2	59	12	0
B	0	2	39	12	0
A	1	1	52	12	0
A	0	2	29	3	0
B	0	2	55	12	0
A	0	1	31	24	0
A	0	1	44	12	0
A	0	1	56	12	0
A	0	1	52	24	0
B	1	2	71	12	1	Granulation tissue formation with scar hyperplasia
A	0	2	63	36	1	Scar hyperplasia
B	0	2	60	5	0
B	0	2	57	5	0
A	0	1	64	60	0
B	0	2	68	12	1	Scar hyperplasia
B	0	1	74	120	0
B	0	2	54	24	1	Scar hyperplasia
A	0	1	52	24	0
B	0	1	54	24	1	Granulation tissue formation
B	0	1	56	24	0
A	0	2	74	240	0
B	0	1	45	24	0
B	0	2	61	360	1	Scar hyperplasia
B	1	2	57	6	1	Granulation tissue formation with scar hyperplasia
A	0	1	63	24	0
B	0	1	60	12	0
B	0	2	64	12	1	Scar hyperplasia
